# Supplementary figures and images for: Identification of Novel Fusion Genes in Bone and Soft Tissue Sarcoma and Their Implication in the Generation of a Mouse Model
Source: MDPI journal article supplement (doi:10.3390/cancers12092345), 2020-08-19

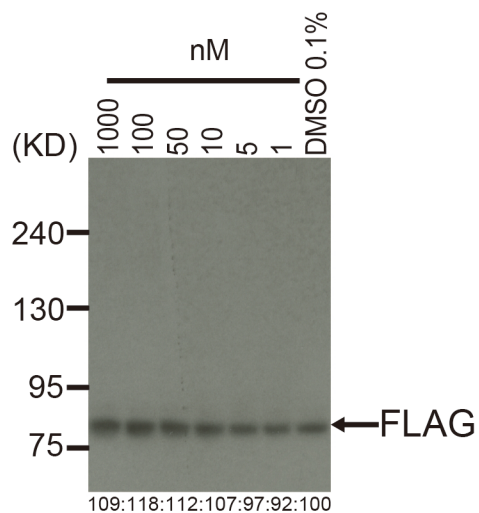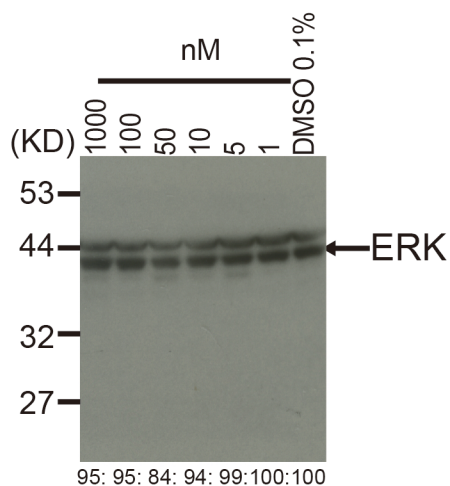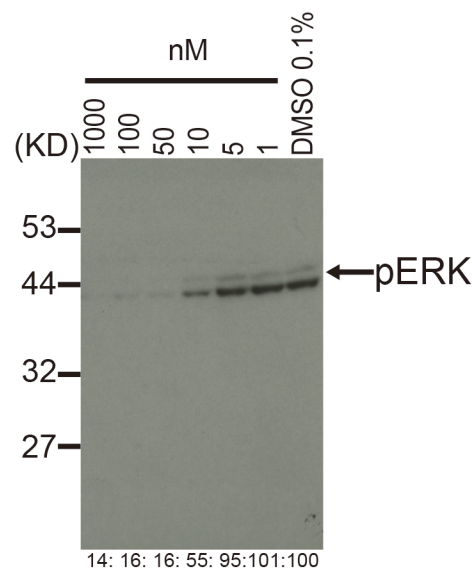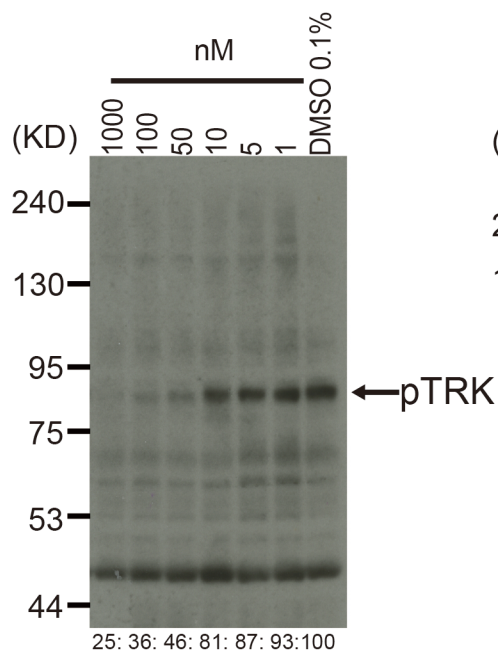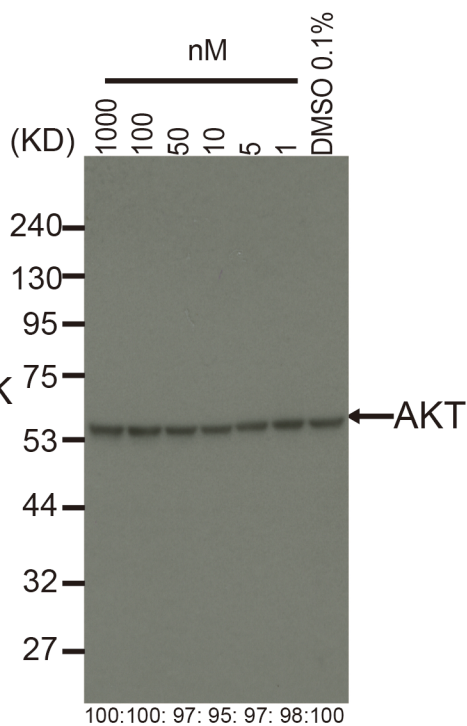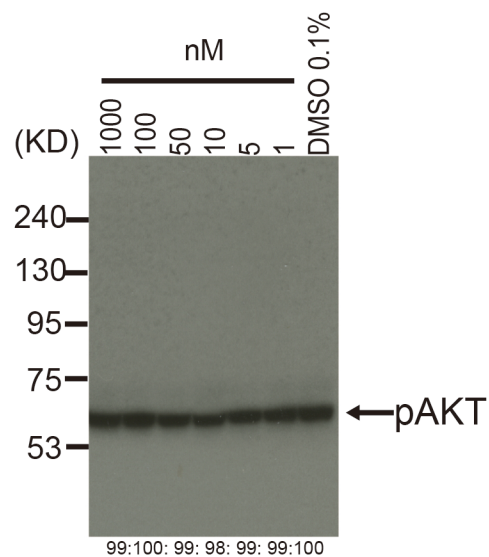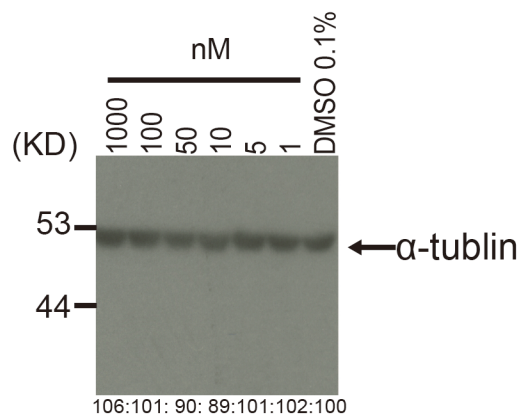

Supplement: s1 [file s1]
